# Supplementary material for: Eight Years of the Great Influenza Survey to Monitor Influenza-Like Illness in Flanders
Source: PLOS journal article supplement (doi:10.1371/journal.pone.0064156), 2013-05-17
Supplement: S1 (10.1371/journal.pone.0064156.s001) [file journal.pone.0064156.s001]

Supporting information for

## Eight years of the Great Influenza Survey to monitor influenza-like illness in Flanders

Yannick Vandendijck<sup>1,\*</sup>, Christel Faes<sup>1</sup>, Niel Hens<sup>1,2</sup>

1 Interuniversity Institute for Biostatistics and statistical Bioinformatics, Hasselt University, Diepenbeek, Belgium

2 Centre for Health Economic Research and Modeling Infectious Diseases, Vaccine and Infectious Disease Institute, University of Antwerp, Wilrijk, Belgium

\* E-mail: yannick.vandendijck@uhasselt.be

In this supporting information, more details on the random walk model of first order (*RW1-model*) are given. The model is explained, and choices of the prior distribution for all parameters can be found.

### Random Walk Model of First Order

Assume that in week  $i$  the number of new ILI cases  $y_i$  is negatively binomial distributed,  $y_i \sim \text{NegBin}(\alpha_i, \tau)$ . The  $\tau$  is often referred to as the dispersion parameter. The mean and variance of  $y_i$  are  $\mu_i = \tau(1 - \alpha_i)/\alpha_i$  and  $\sigma_i^2 = \mu_i(1 + \mu_i/\tau)$ , respectively. Assume that the mean  $\mu_i$  is modeled as  $\mu_i = E_i \exp(\eta_i)$ , where  $E_i$  represents the known offset in week  $i$  and  $\eta_i$  is a linear predictor. The offset  $E_i$  is chosen equally to the number of active participants in week  $i$ . The linear predictor  $\eta_i$  is modeled as  $\eta_i = \beta_0 + \delta_i$ , where  $\beta_0$  represents the intercept and  $\boldsymbol{\delta} = (\delta_1, \dots, \delta_T)'$  are time-specific parameters that follow a random walk model of first order. The latter model assumes that the differences between two adjacent parameters follow a multivariate normal distribution with a mean of zero. This results in the following distribution for  $\boldsymbol{\delta}$  [1]:

$$\begin{aligned} \pi(\boldsymbol{\delta}|\sigma_\delta^2) &\propto \exp\left(-\frac{1}{2\sigma_\delta^2} \sum_{t=2}^T (\delta_t - \delta_{t-1})^2\right) \\ &= \exp\left(-\frac{1}{2\sigma_\delta^2} \boldsymbol{\delta}' \mathbf{R}_\delta \boldsymbol{\delta}\right), \end{aligned}$$

where  $\sigma_\delta^2$  is an unknown variance parameter and  $\mathbf{R}_\delta$  is a structured matrix of the form given by

$$\mathbf{R}_\delta = \begin{pmatrix} 1 & -1 & & & & & & & & \\ -1 & 2 & -1 & & & & & & & \\ & -1 & 2 & -1 & & & & & & \\ & & \vdots & \vdots & \vdots & & & & & \\ & & & -1 & 2 & -1 & & & & \\ & & & & -1 & 2 & -1 & & & \\ & & & & & -1 & 2 & -1 & & \\ & & & & & & -1 & 1 & & \end{pmatrix}.$$

A Bayesian approach is taken, and the following uninformative priors are chosen for the unknown parameters:

$$\begin{aligned}\log(\sigma_\delta^2) &\sim \text{LogGamma}(1, 0.001), \\ \pi(\beta_0|\nu_1) &\sim \mathcal{N}(0, \nu_1^{-1}) \quad \text{with } \nu_1 = 0.001, \\ \pi(\tau|\nu_2) &\sim \mathcal{N}(0, \nu_2^{-1}) \quad \text{with } \nu_2 = 0.001.\end{aligned}$$

This model is fitted using approximate Bayesian inference by integrated nested Laplace approximations (INLA) [2]. This method yields very good approximate Bayesian inference in structured additive regression models with latent Gaussian fields. A major advantage of INLA is that it returns accurate parameter estimates in a short computational time. Models were fit in R version 2.14 using the INLA package [3].

## References

1. Schrödle B, Held L (2011) Spatio-temporal disease mapping using INLA. *Environmetrics* 22: 725-734.
2. Rue H, Martino S, Chopin N (2009) Approximate Bayesian inference for latent Gaussian models by using integrated nested Laplace approximations (with discussion). *J Roy Stat Soc B* 71: 319-392.
3. Martino S, Rue H (2009) Implementing approximate Bayesian inference using integrated nested Laplace approximation: a manual for the INLA program. Available from: <http://www.inla.org/download>.
